# Supplementary material
Source: Springer Nature journal article supplement (https://www.springermedizin.de/resource/supplementary/13063_2012_1119_MOESM2_ESM.pdf/9619424)
Supplement: MOESM2 [file 9619424]

Children aged 6 months to 16 years who are:

- a) referred from community screening, GPs or other health professionals;
- b) existing patients with untreated X(T)

Initial clinic visit for new referrals: routine clinical assessment;  
discussion about management of X(T) and study information

Telephone call from member of study team to resolve any queries

Recruitment clinic:  
Initial clinical data checked to confirm eligibility; informed consent sought;  
centralised web-based **randomisation** and QOL evaluation

Active Monitoring

**3 months after recruitment**

**3-month** monitoring visit  
(clinical, HSUQ & TTTQ  
assessments by TO)

**6 months after recruitment**

**6-month** monitoring visit  
(clinical and HSUQ  
assessments by TO)

**9 months after recruitment**

**Blinded 9-month outcome** visit  
(clinical, QOL and HSUQ  
assessments by RO)

Surgery

**3 months after recruitment**

Pre-assessment & surgery  
within **3 months**; 2-week post-  
op visit (clinical and HSUQ  
assessments by TO)

**~6 months after recruitment**

**3-month post-op** visit  
(clinical, HSUQ and TTTQ  
assessments by TO)

**~9months after recruitment**

**Blinded 6-month post-op**  
**outcome** visit (clinical, QOL  
and HSUQ assessments by RO)
